# Supplementary material for: Interconnection between the Southern South China Sea and the Java Sea through the Karimata Strait
Source: MDPI journal article supplement (doi:10.3390/jmse9101040), 2021-09-22
Supplement: s1 [file s1]

Archive with 1 entries (1 files):
- jmse-1314820-supplementary.pdf
