# Supplementary material for: Interconnection between the Southern South China Sea and the Java Sea through the Karimata Strait
Source: MDPI journal article supplement (doi:10.3390/jmse9101040), 2021-09-22
Supplement: s1 [file s1 › jmse-1314820-supplementary.pdf]

Article

# Interconnection between the Southern South China Sea and the Java Sea through the Karimata Strait

Poh Heng Kok <sup>1</sup>, Sarath Wijeratne <sup>2</sup>, Mohd Fadzil Akhir <sup>1,\*</sup>, Charitha Pattiaratchi <sup>2</sup>, Nur Hidayah Roseli <sup>1,3</sup>, and Fariz Syafiq Mohamad Ali <sup>1</sup>

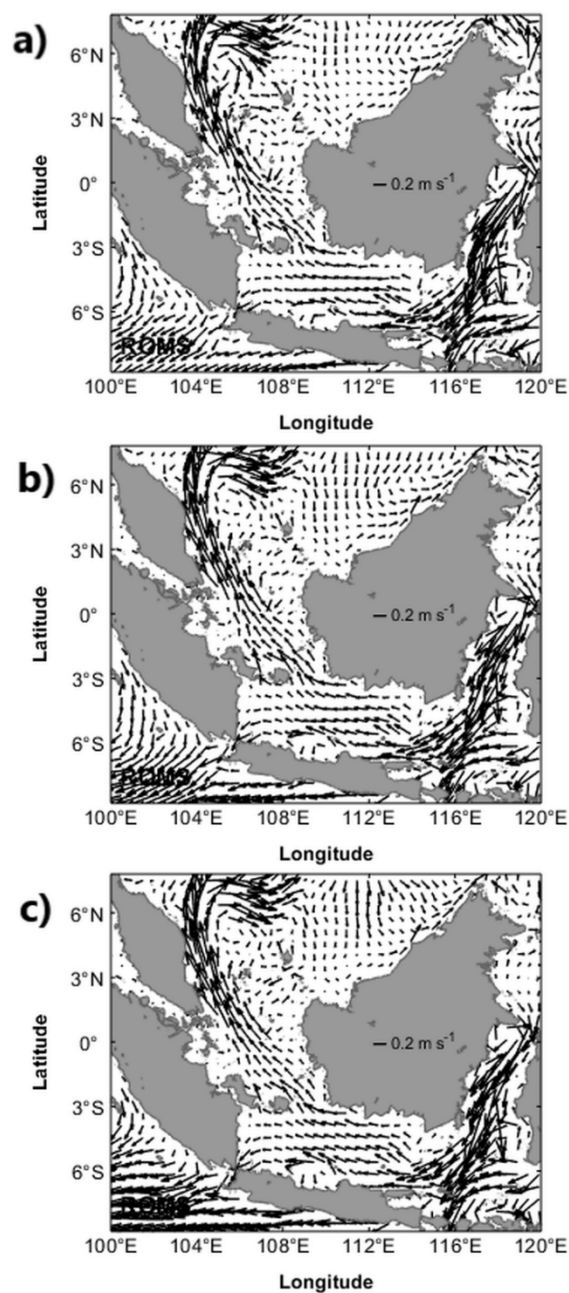

Figure S1: Climatology of surface current (unit:  $\text{m s}^{-1}$ ) derived from ROMS in a) June, b) July, and c) August.

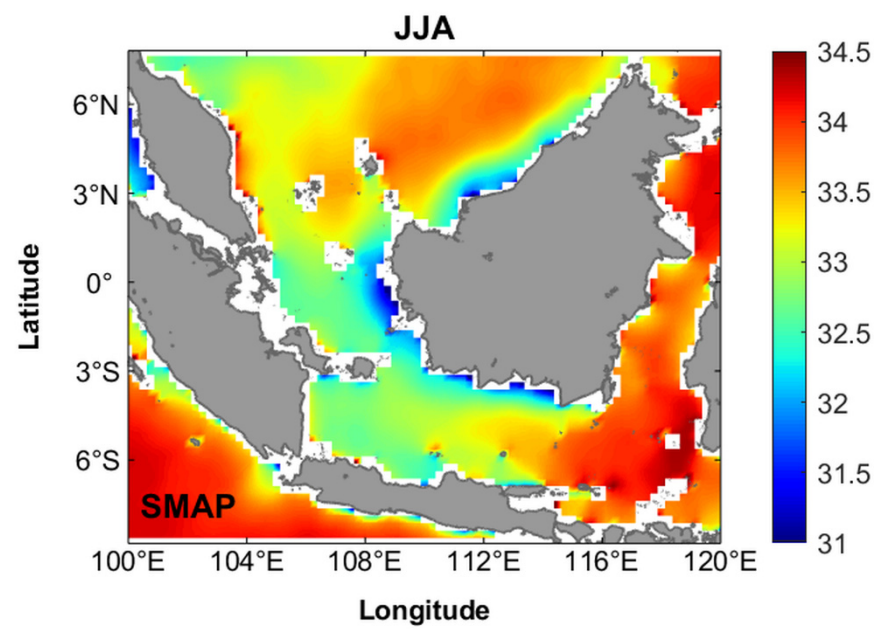

Figure S2: Seasonal SSS (unit: psu) climatology during the boreal summer derived from SMAP.
